# Supplementary material
Source: PubMed Central journal article supplement (PMC6625071)
Supplement: jamadermatol-155-1022-s001.pdf [file jamadermatol-155-1022-s001.pdf]

## Supplementary Online Content

Chen W-T, Chi C-C. Association of hidradenitis suppurativa with inflammatory bowel disease: a systematic review and meta-analysis. *JAMA Dermatol*. Published online July 10, 2019. doi:10.1001/jamadermatol.2019.0891

**eTable.** Search strategy

This supplementary material has been provided by the authors to give readers additional information about their work.

eTable. Search Strategy

| Database                                       | Search Strategy of Electronic Database in Sequence <sup>a</sup>                     |
|------------------------------------------------|-------------------------------------------------------------------------------------|
| Cochrane Central Register of Controlled Trials | 1. MeSH descriptor: [Hidradenitis Suppurativa] explode all trees                    |
|                                                | 2. acne invers*:ti,ab,kw                                                            |
|                                                | 3. invers* acne:ti,ab,kw                                                            |
|                                                | 4. hidradeniti* suppurativ*:ti,ab,kw                                                |
|                                                | 5. suppurativ* hidradeniti*:ti,ab,kw                                                |
|                                                | 6. velpau* disease:ti,ab,kw                                                         |
|                                                | 7. verneuil* disease:ti,ab,kw                                                       |
|                                                | 8. 1 or 2 or 3 or 4 or 5 or 6 or 7                                                  |
|                                                | 9. MeSH descriptor: [Inflammatory Bowel Diseases] explode all trees                 |
|                                                | 10. inflammatory bowel disease:ti,ab,kw                                             |
|                                                | 11. MeSH descriptor: [Crohn Disease] explode all trees                              |
|                                                | 12. Crohn\$ disease:ti,ab,kw                                                        |
|                                                | 13. Crohn\$ colitis:ti,ab,kw                                                        |
|                                                | 14. granulomatous colitis:ti,ab,kw                                                  |
|                                                | 15. Crohn\$ enteritis:ti,ab,kw                                                      |
|                                                | 16. regional enteritis:ti,ab,kw                                                     |
|                                                | 17. MeSH descriptor: [Colitis, Ulcerative] explode all trees                        |
|                                                | 18. ulcerative colitis:ti,ab,kw                                                     |
|                                                | 19. idiopathic proctocolitis:ti,ab,kw                                               |
|                                                | 20. pancolitis:ti,ab,kw                                                             |
|                                                | 21. colitis gravis:ti,ab,kw                                                         |
|                                                | 22. ulcerative proctosigmoiditis:ti,ab,kw                                           |
|                                                | 23. 9 or 10 or 11 or 12 or 13 or 14 or 15 or 16 or 17 or 18 or 19 or 20 or 21 or 22 |
|                                                | 24. 8 and 23                                                                        |
| MEDLINE                                        | 1. exp Hidradenitis Suppurativa/                                                    |
|                                                | 2. acne invers\$1.ti,ab.                                                            |
|                                                | 3. invers\$ acne.ti,ab.                                                             |
|                                                | 4. hidradeniti\$ suppurativ\$.ti,ab.                                                |
|                                                | 5. suppurativ\$ hidradeniti\$.ti,ab.                                                |
|                                                | 6. velpau\$ disease.ti,ab.                                                          |
|                                                | 7. verneuil\$ disease.ti,ab.                                                        |
|                                                | 8. or/1-7                                                                           |
|                                                | 9. exp Inflammatory Bowel Diseases/                                                 |
|                                                | 10. inflammatory bowel disease.mp.                                                  |
|                                                | 11. exp Crohn Disease/                                                              |
|                                                | 12. Crohn\$ disease.mp.                                                             |
|                                                | 13. Crohn\$ colitis.mp.                                                             |
|                                                | 14. granulomatous colitis.mp.                                                       |
|                                                | 15. Crohn\$ enteritis.mp.                                                           |
|                                                | 16. regional enteritis.mp.                                                          |

|        |                                                                                           |
|--------|-------------------------------------------------------------------------------------------|
|        | 17. exp Colitis, Ulcerative/                                                              |
|        | 18. ulcerative colitis.mp.                                                                |
|        | 19. idiopathic proctocolitis.mp.                                                          |
|        | 20. pancolitis.mp.                                                                        |
|        | 21. colitis gravis.mp.                                                                    |
|        | 22. ulcerative proctosigmoiditis.mp.                                                      |
|        | 23. or/9-22                                                                               |
|        | 24. 8 and 23                                                                              |
|        | 1. acne AND invers\$:ti,ab                                                                |
|        | 2. invers\$ AND acne:ti,ab                                                                |
|        | 3. hidradeniti\$ AND suppurativ\$:ti,ab                                                   |
|        | 4. suppurativ\$ AND hidradeniti\$:ti,ab                                                   |
|        | 5. velpseau\$ AND disease:ti,ab                                                           |
|        | 6. velpseau\$ AND disease:ti,ab                                                           |
|        | 7. 'suppurative hidradenitis'/exp                                                         |
|        | 8. 1 or 2 or 3 or 4 or 5 or 6 or 7                                                        |
|        | 9. 'inflammatory bowel disease'/exp                                                       |
|        | 10. 'inflammatory bowel disease'                                                          |
|        | 11. 'crohn disease'/exp                                                                   |
|        | 12. 'crohn\$ disease'                                                                     |
| Embase | 13. 'crohn\$ colitis'                                                                     |
|        | 14. 'granulomatous colitis'                                                               |
|        | 15. 'crohn\$ enteritis'                                                                   |
|        | 16. 'regional enteritis'                                                                  |
|        | 17. 'ulcerative colitis'/exp                                                              |
|        | 18. 'ulcerative colitis'                                                                  |
|        | 19. 'idiopathic proctocolitis'                                                            |
|        | 20. 'pancolitis'                                                                          |
|        | 21. 'colitis gravis'                                                                      |
|        | 22. 'ulcerative proctosigmoiditis'                                                        |
|        | 23. 9 or 10 or 11 or 12 or 13 or 14 or 15 or 16 or 17 or 18 or 19 or 20 or 21 or 22 or 33 |
|        | 24. 8 and 23                                                                              |

Abbreviations: ab, abstract; kw, key word; mp, multi-purpose; ti, title.

<sup>a</sup>The detailed information for fields of search is described in

<http://ospguides.ovid.com/OSPguides/cochdb.htm>.
